# Supplementary material
Source: Springer Nature journal article supplement (https://www.springermedizin.de/resource/supplementary/12890_2012_352_MOESM3_ESM.pdf/9504982)

**Pre-treatment X-rays showing  
cavitating granulomas**

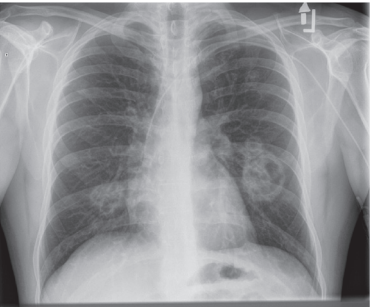

**Post-treatment X-rays showing  
substantial resolution**

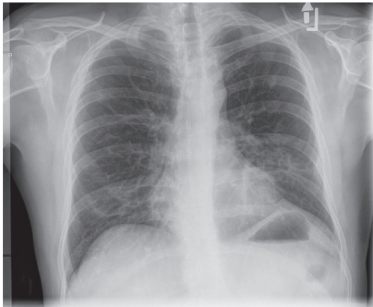

Supplement: MOESM3 [file 9504982]
